# Supplementary material for: Asymmetric recruitment and actin-dependent cortical flows drive the neuroblast polarity cycle
Source: eLife journal article supplement (doi:10.7554/elife.45815), 2019-05-08
Supplement: supp [file elife-45815-supp-v1.zip]

Archive with 14 entries (14 files):
- elife_poa_e45815_Figure_5_video_1.mov
- elife_poa_e45815_Figure_6_video_1.mov
- elife_poa_e45815_Transparent_Reporting_File.docx
- elife_poa_e45815_Figure_6_figure_supplement_1.pdf
- elife_poa_e45815_Figure_4_video_3.mov
- elife_poa_e45815_Figure_6_video_3.mov
- elife_poa_e45815_Figure_2_source_data_1.csv
- elife_poa_e45815_Figure_1_video_1.mov
- elife_poa_e45815_Figure_4_video_2.mov
- elife_poa_e45815_Figure_6_video_2.mov
- elife_poa_e45815_Figure_1_figure_supplement_1.pdf
- elife_poa_e45815_Figure_4_video_1.mov
- elife_poa_e45815_Figure_4_figure_supplement_1.pdf
- elife_poa_e45815_Figure_4_figure_supplement_1_source_data_1.csv
