# Supplementary material for: Asymmetric recruitment and actin-dependent cortical flows drive the neuroblast polarity cycle
Source: eLife journal article supplement (doi:10.7554/elife.45815), 2019-05-08
Supplement: supp [file elife-45815-supp-v1.zip › elife_poa_e45815_Figure_2_source_data_1.csv]

2B-apical	2B-basal
10	0
7	0
8	0
8	0
7	0
7	0
2	0
7	0
8	1
5	0
9	0
12	0
10	0
7	2
10	0
9	0
7	0
13	0
7	1
7	0
