# Supplementary material for: Asymmetric recruitment and actin-dependent cortical flows drive the neuroblast polarity cycle
Source: eLife journal article supplement (doi:10.7554/elife.45815), 2019-05-08
Supplement: supp [file elife-45815-supp-v1.zip › elife_poa_e45815_Figure_4_figure_supplement_1_source_data_1.csv]

4-1D-WT	4-1D-Interphase-LatA	4-1D-Prophase-LatA
10	0	3
7	1	7
8	5	5
8	2	2
7	5	2
7	2	7
2	6	7
7	4	7
8	0	6
5	0	8
9	0	9
12	7	5
10	1	7
7	1	1
10	1	11
9	2	7
7	2	4
13	1	2
7	2	4
7	0	1
