# Supplementary figures and images for: Asymmetric recruitment and actin-dependent cortical flows drive the neuroblast polarity cycle
Source: eLife journal article supplement (doi:10.7554/elife.45815), 2019-05-08

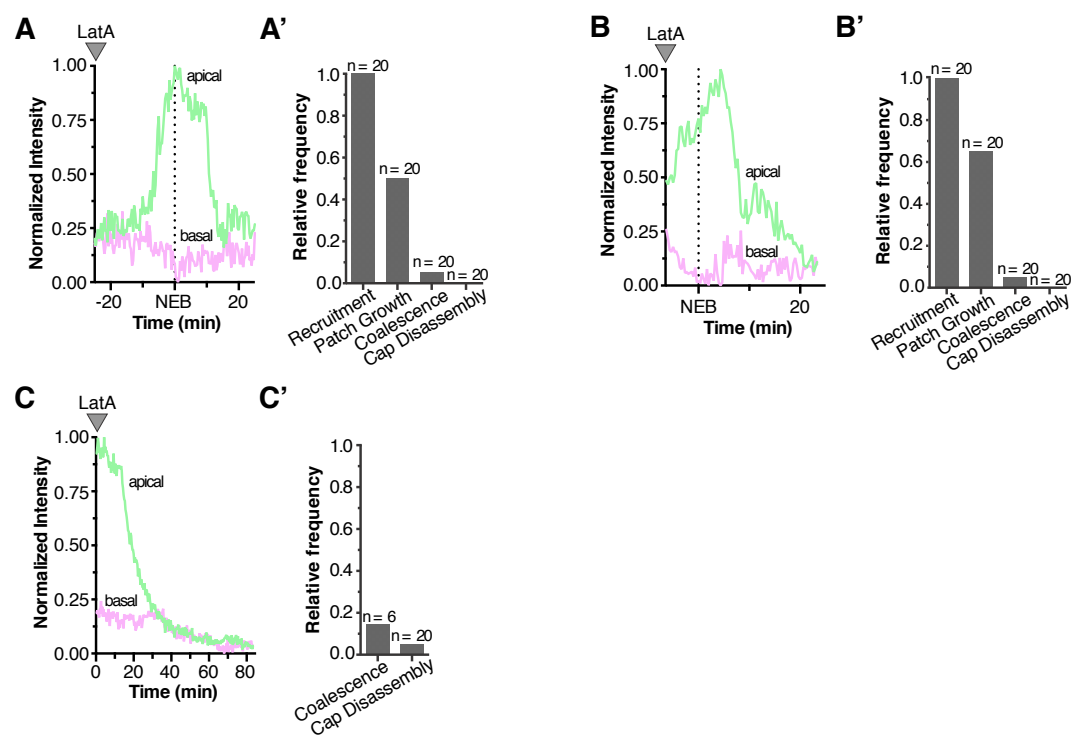

Supplement: supp [file elife-45815-supp-v1.zip › elife_poa_e45815_Figure_6_figure_supplement_1.pdf]

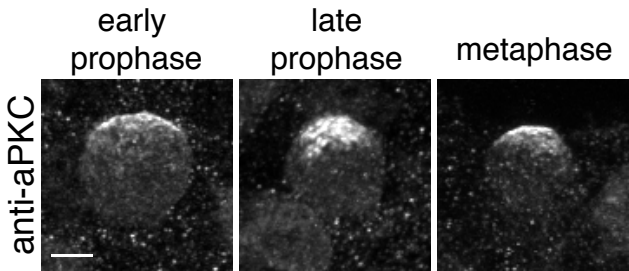

Supplement: supp [file elife-45815-supp-v1.zip › elife_poa_e45815_Figure_1_figure_supplement_1.pdf]

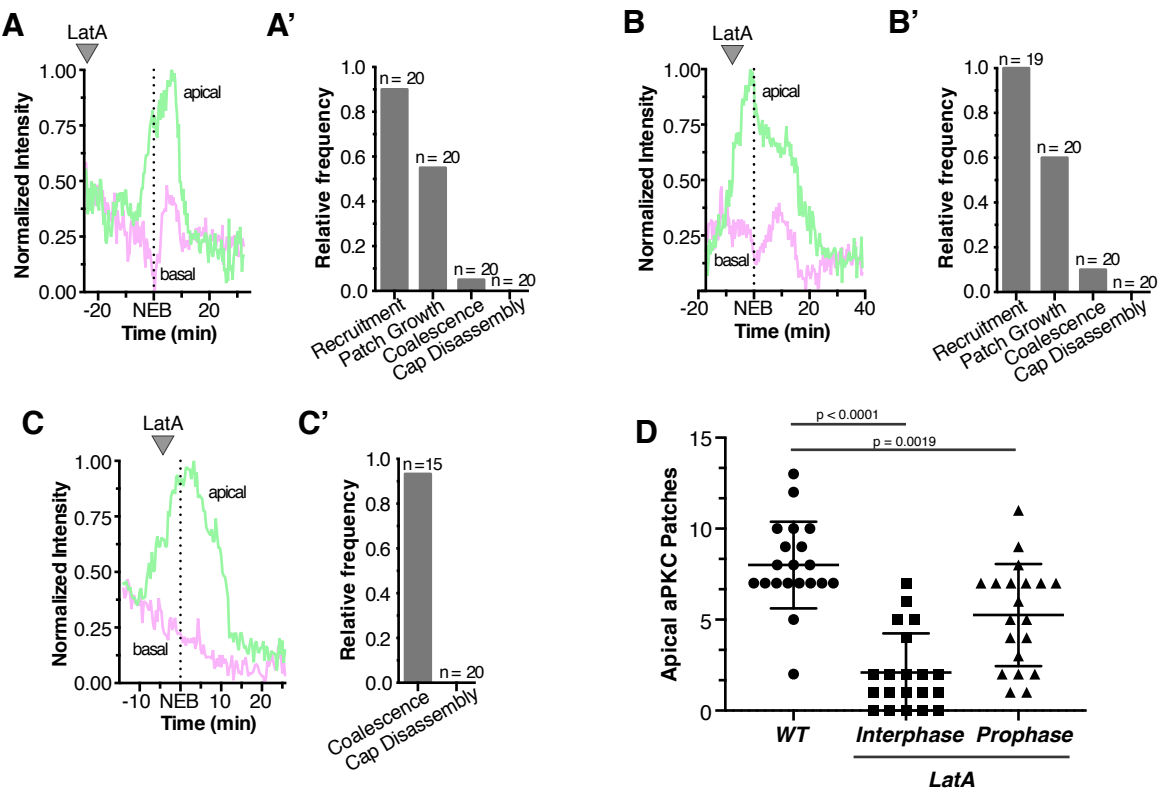

Supplement: supp [file elife-45815-supp-v1.zip › elife_poa_e45815_Figure_4_figure_supplement_1.pdf]
